# Supplementary material for: Apoptosis mediated leishmanicidal activity of Azadirachta indica bioactive fractions is accompanied by Th1 immunostimulatory potential and therapeutic cure in vivo
Source: PubMed Central journal article supplement (PMC4381458; doi:10.1186/s13071-015-0788-3), 2015-03-26
Supplement: 13071_2015_788_MOESM1_ESM.pdf [file 13071_2015_788_MOESM1_ESM.pdf]

**Additional File 1. GC-MS constituents of ALE**

| <b>S. No.</b> | <b>RT</b>     | <b>%Area</b> | <b>Compound</b>                                                   |
|---------------|---------------|--------------|-------------------------------------------------------------------|
| 1.            | 7.262         | 0.88         | 2-Pyrrolidinone                                                   |
| 2.            | 16.444        | 0.32         | Dodecanol                                                         |
| 3.            | 17.177        | 0.07         | Trans- $\beta$ -Caryophyllene                                     |
| 4.            | 19.579        | 0.22         | 2,4-Ditert-butylphenol                                            |
| 5.            | 21.278        | 0.14         | Pentadecene                                                       |
| 6.            | 25.280        | 0.37         | Myristic acid                                                     |
| 7.            | 25.544        | 0.22         | (-)-Loliolide                                                     |
| 8.            | 26.612        | 1.04         | Neophytadiene                                                     |
| 9.            | 27.119        | 0.24         | (2E)-3,7,11,15,-Tetramethyl-2-hexadecen-1-ol                      |
| 10.           | 27.746        | 0.42         | 2-Hexadecen-1-ol                                                  |
| 11.           | <b>29.394</b> | <b>7.90</b>  | <b>Palmitic acid</b>                                              |
| 12.           | 29.637        | 0.31         | $\alpha$ -Octadecene                                              |
| 13.           | 31.140        | 0.26         | d-Galactose, dioctyl mercaptal                                    |
| 14.           | 31.930        | 3.97         | Phytol                                                            |
| 15.           | <b>32.636</b> | <b>5.90</b>  | <b>cis,cis,cis-7,10,13-Hexadecatrienal</b>                        |
| 16.           | 32.957        | 0.84         | Stearic acid                                                      |
| 17.           | 33.278        | 0.2          | Heneicosanol                                                      |
| 18.           | <b>39.212</b> | <b>25.21</b> | <b>1,2-Benzenedicarboxylic acid</b>                               |
| 19.           | 42.299        | 0.4          | 1,2-Benzenedicarboxylic acid didecyl ester                        |
| 20.           | 42.759        | 0.74         | 1,2-Benzenedicarboxylic acid diisodecyl ester                     |
| 21.           | 43.147        | 0.32         | Pregn-4-ene-3,20-dione                                            |
| 22.           | 43.608        | 0.10         | Actetamidocyclohexane                                             |
| 23.           | 43.808        | 0.04         | 2-(3,7-Dimethyl-octa-2,6-dienyl)-4-methoxy phenol                 |
| 24.           | 44.144        | 0.21         | Heneicosane                                                       |
| 25.           | 44.942        | 0.35         | Tetratriacontane                                                  |
| 26.           | 45.123        | 0.17         | 2,2,6,6-Tetramethyl-4-piperidinyl benzoate                        |
| 27.           | 45.356        | 0.88         | $\alpha$ -Tocopherol                                              |
| 28.           | 46.029        | 0.08         | Zymosterol                                                        |
| 29.           | 46.074        | 0.96         | Retinol acetate                                                   |
| 30.           | 46.398        | 0.84         | Stigmasta-5,22-dien-3-ol                                          |
| 31.           | 46.854        | 1.30         | $\gamma$ -Sitosterol                                              |
| 32.           | 47.108        | 0.15         | Retinoic acid                                                     |
| 33.           | 47.256        | 2.33         | Oxatricyclo[20.80.0(7,16)]triaconta-1(22),7(16),9,13,23,29-hexane |
| 34.           | <b>47.709</b> | <b>16.95</b> | <b>Stigmasterol acetate</b>                                       |
| 35.           | 48.019        | 4.74         | Stigmasterol                                                      |
| 36.           | <b>48.222</b> | <b>7.47</b>  | <b>Ergosterol acetate</b>                                         |
| 37.           | 48.586        | 0.28         | 2,6,10-Trimethyl,14-ethylene-14-pentadecne                        |
| 38.           | 48.808        | 0.13         | Secodammar-4(28)-en-3-oic acid                                    |
| 39.           | 48.951        | 0.76         | Humulene-1,6-dien-3-ol                                            |

|     |        |      |                                                                                                                                              |
|-----|--------|------|----------------------------------------------------------------------------------------------------------------------------------------------|
| 40. | 49.391 | 2.59 | Retinol                                                                                                                                      |
| 41. | 49.814 | 0.51 | Medroxyprogesterone acetate                                                                                                                  |
| 42. | 50.133 | 0.30 | Stigmasta-5,22-dien-3- $\beta$ -ol                                                                                                           |
| 43. | 50.394 | 0.45 | Strophanthidol                                                                                                                               |
| 44. | 50.755 | 0.25 | Acetoxypregnenolone acetate                                                                                                                  |
| 45. | 51.142 | 0.4  | Trans retinol-acetate                                                                                                                        |
| 46. | 51.325 | 1.22 | Hydroxycholesterol                                                                                                                           |
| 47. | 51.913 | 0.36 | 6-(1,5-Dimethyl-hex-4-enyl)-1,6-dihydroxy-1, 8a -dimethyl-3-oxo-1,2,3, 3a,5a,6.7,8,8a,9,10,10a-dodecahydrodicyclopenta[a,e]cyclooctene       |
| 48. | 52.425 | 0.39 | N 2-(3-hydroxy-4,4,10,13,14,-pentamethyl-2,3,4,5,6,7,10,11,12,13,14,15,16,17-tetradecahydro-1H-cyclopenta[a]phenanthryl-methanesulfonic acid |
| 49. | 53.373 | 5.80 | Butenoic acid,2-methyl,1a-2,4,4a,5,9,-hexahydro-4,4a,6-trimethyl-3H-oxiremo[8,8a]naphthalo[2,3-b]furan-5-yl ester                            |

Major constituents are highlighted in bold
