# Supplementary material for: Apoptosis mediated leishmanicidal activity of Azadirachta indica bioactive fractions is accompanied by Th1 immunostimulatory potential and therapeutic cure in vivo
Source: PubMed Central journal article supplement (PMC4381458; doi:10.1186/s13071-015-0788-3), 2015-03-26
Supplement: 13071_2015_788_MOESM2_ESM.pdf [file 13071_2015_788_MOESM2_ESM.pdf]

**Additional File 2. GC-MS constituents of ASE**

| <b>S.No.</b> | <b>RT</b>     | <b>%Area</b> | <b>Compound</b>                                                                           |
|--------------|---------------|--------------|-------------------------------------------------------------------------------------------|
| 1.           | 6.066         | 0.18         | Decane                                                                                    |
| <b>2.</b>    | <b>9.353</b>  | <b>8.56</b>  | <b>1,2,3-Propanetriol</b>                                                                 |
| 3.           | 11.127        | 0.06         | Undecanol                                                                                 |
| 4.           | 11.342        | 0.09         | Dodecane                                                                                  |
| 5.           | 16.427        | 0.17         | 3-Hexadecene                                                                              |
| 6.           | 19.568        | 0.27         | 2,4-Ditert-Butylphenol                                                                    |
| 7.           | 21.278        | 0.31         | E-14-Hexadecenal                                                                          |
| 8.           | 25.296        | 0.18         | Tetradecanoic acid                                                                        |
| 9.           | 25.654        | 0.28         | Octadecene                                                                                |
| 10.          | 26.607        | 0.08         | 2,6,10-Trimethyl,14-ethylene-14-pentadecne                                                |
| 11.          | 28.393        | 2.04         | n-Hexadecanoic acid methyl ester                                                          |
| <b>12.</b>   | <b>29.542</b> | <b>6.84</b>  | <b>Palmitic acid</b>                                                                      |
| 13.          | 29.726        | 3.61         | Ethyl palmitate                                                                           |
| 14.          | 31.705        | 5.59         | Octadecenoic acid, methyl ester                                                           |
| 15.          | 32.152        | 1.31         | Stearic acid methyl ester                                                                 |
| <b>16.</b>   | <b>32.775</b> | <b>7.40</b>  | <b>Linoleic acid</b>                                                                      |
| <b>17.</b>   | <b>32.938</b> | <b>12.96</b> | <b>(E)-9-Octadecenoic acid ethyl ester</b>                                                |
| 18.          | 33.219        | 0.89         | Octadecanoic acid                                                                         |
| 19.          | 33.372        | 2.12         | Ethyl octadecanoate                                                                       |
| 20.          | 36.688        | 0.5          | Stearic acid ethyl ester                                                                  |
| 21.          | 37.726        | 0.09         | Fumaric acid, 2-dimethylaminoethylnonyl ester                                             |
| 22.          | 39.183        | 7.14         | 1,2-Benzenedicarboxylic acid                                                              |
| 23.          | 39.778        | 0.28         | Hexadecanoic acid ethyl ester                                                             |
| 24.          | 40.188        | 0.13         | 2-Butoxyethyl oleate                                                                      |
| 25.          | 40.958        | 0.08         | Kauren-19-yl-acetate                                                                      |
| 26.          | 41.162        | 0.43         | Tetratriacontane                                                                          |
| 27.          | 41.992        | 0.59         | 3-Hydroxy-6-isopropenyl-4,8a-dimethyl-1,2,3,4,5,6,7,8,8a-octahydro-2-naphthalenyl acetate |
| 28.          | 42.297        | 0.42         | Ethyl docosanoate                                                                         |
| 29.          | 42.632        | 0.64         | Squalene                                                                                  |
| 30.          | 43.280        | 0.66         | Hexatriacontane                                                                           |
| 31.          | 43.600        | 0.16         | Linolenic acid methyl ester                                                               |
| 32.          | 44.613        | 0.22         | 12-Hydroxy-16,17-dimethyl-pregn-4-ene                                                     |
| 33.          | 44.942        | 0.57         | Tetratetracontane                                                                         |
| 34.          | 45.058        | 0.01         | Docosanol                                                                                 |
| 35.          | 45.187        | 0.34         | 4,4-7a-Trimethyl-1,3-dimethylene                                                          |
| 36.          | 45.365        | 0.3          | $\delta$ -Corlin                                                                          |
| 37.          | 45.945        | 0.14         | (3E,5E,7E)-6-Methyl-8-(2,6,6-trimethyl-1-cyclohexen-1-yl)-3,5,7-octatrien-2-one           |
| 38.          | 46.108        | 3.87         | 6 $\beta$ -Hydroxymethandienone                                                           |
| 39.          | 46.440        | 0.51         | Retinol acetate                                                                           |
| 40.          | 46.740        | 0.6          | (E,E,E)-3,7,11,15-Tetramethylhexadeca-1,3,6,10,14-pentane                                 |

|            |               |              |                                                                                                                   |
|------------|---------------|--------------|-------------------------------------------------------------------------------------------------------------------|
| 41.        | 46.861        | 0.68         | $\gamma$ -Sitosterol                                                                                              |
| 42.        | 47.237        | 0.5          | Oxatricyclo[20.80.0(7,16)]triaconta-1(22),7(16),9,13,23,29-hexane                                                 |
| 43.        | 47.592        | 0.46         | Ergosta-7,22-dien-3- $\beta$ -ol, acetate                                                                         |
| 44.        | 47.913        | 1.29         | Methyl-3-acetoxy-12-keto-18-norcholanate                                                                          |
| 45.        | 48.111        | 1.63         | 2,4,6-Triisopropylbenzoylchloride                                                                                 |
| 46.        | 48.558        | 2.53         | Androst-5-ene-3,19-diol acetate                                                                                   |
| <b>47.</b> | <b>49.151</b> | <b>10.45</b> | <b>19-Hydroxyandrost-5-en-3-yl acetate</b>                                                                        |
| 48.        | 49.306        | 2.01         | Santolina epoxide                                                                                                 |
| 49.        | 49.760        | 0.56         | Menthofuran                                                                                                       |
| 50.        | 50.423        | 0.30         | Strophanthidol-3,19-diacetate                                                                                     |
| 51.        | 50.782        | 0.22         | 21-Acetoxy-3-pregenolone acetate                                                                                  |
| 52.        | 51.053        | 0.61         | Desoxycorticosterone acetate                                                                                      |
| 53.        | 51.364        | 0.33         | 26-Hydroxycholesterol                                                                                             |
| 54.        | 52.133        | 2.78         | Acetoxy-bisnor-5-cholenic acid                                                                                    |
| 55.        | 52.609        | 0.15         | 20-Ethynyl-5-pregen-3,20-diol                                                                                     |
| 56.        | 53.227        | 1.56         | Stigmasterol                                                                                                      |
| 57.        | 53.983        | 2.22         | Butenoic acid,2-methyl,1a-2,4,4a,5,9,-hexahydro-4,4a,6-trimethyl-3H-oxiremo[8,8a]naphthalo[2,3-b]furan-5-yl ester |
| 58.        | 58.836        | 1.07         | 9-Octadecenoic acid (Z)-,2-hydroxyl-1,3-propanediyl ester                                                         |

Major components are highlighted in bold
